# Supplementary material for: Evaluation einer Basisschulung für Patienten mit rheumatoider Arthritis
Source: Springer Nature journal article supplement (doi:10.1007/s00393-020-00769-4), 2020-03-16
Supplement: MOESM1 [file 17802732]

Tabelle S1: Zielgrößen in der Analyse „per protocol“

|                                                    | Ausgangsbefragung (T1) |         |                |         | Nachbefragung (T3) |         |                |         |
|----------------------------------------------------|------------------------|---------|----------------|---------|--------------------|---------|----------------|---------|
|                                                    | Intervention           |         | Wartekontrolle |         | Intervention       |         | Wartekontrolle |         |
|                                                    | M                      | (SD)    | M              | (SD)    | M                  | (SD)    | M              | (SD)    |
| <b>Hauptzielgrößen</b>                             |                        |         |                |         |                    |         |                |         |
| Wissenstest                                        | 17,33                  | (4,82)  | 18,59          | (4,47)  | 20,02              | (4,52)  | 18,71          | (4,61)  |
| Selbsteinschätzung des Wissen<br>und Zufriedenheit | 19,88                  | (6,79)  | 20,52          | (7,12)  | 23,43              | (7,08)  | 20,15          | (6,37)  |
| Gesundheitskompetenz/<br>Health Literacy           | 32,88                  | (7,29)  | 31,59          | (7,25)  | 33,34              | (7,64)  | 30,10          | (7,18)  |
| <b>Nebenzielgrößen</b>                             |                        |         |                |         |                    |         |                |         |
| <i>Einstellungen</i>                               |                        |         |                |         |                    |         |                |         |
| Krankheitsakzeptanz                                | 4,06                   | (1,13)  | 4,03           | (1,11)  | 3,98               | (1,32)  | 4,02           | (1,32)  |
| Krankheitskommunikation                            | 4,02                   | (1,28)  | 3,97           | (1,31)  | 4,31               | (1,26)  | 3,69           | (1,33)  |
| Selbstwirksamkeit                                  | 5,99                   | (2,10)  | 5,61           | (1,86)  | 6,01               | (2,18)  | 5,49           | (2,34)  |
| Kontrollüberzeugung                                | 2,76                   | (0,40)  | 2,75           | (0,38)  | 2,77               | (0,39)  | 2,80           | (0,45)  |
| <i>Erkrankung und Befinden</i>                     |                        |         |                |         |                    |         |                |         |
| Funktionsfähigkeit                                 | 68,81                  | (24,06) | 66,59          | (22,60) | 66,60              | (23,80) | 68,17          | (22,50) |
| Schmerzbelastung                                   | 3,85                   | (2,11)  | 4,19           | (1,99)  | 3,94               | (2,14)  | 3,84           | (2,17)  |
| Krankheitsaktivität                                | 3,69                   | (1,92)  | 3,73           | (1,76)  | 3,55               | (1,91)  | 3,53           | (1,81)  |
| Globale Selbsteinschätzung der<br>Erkrankung       | 3,59                   | (2,28)  | 3,64           | (2,00)  | 3,46               | (2,17)  | 3,55           | (2,32)  |
| Depression und Angst                               | 2,74                   | (2,36)  | 3,53           | (2,33)  | 2,86               | (2,53)  | 3,54           | (3,97)  |
| <i>Patientenkompetenz</i>                          |                        |         |                |         |                    |         |                |         |
| Kommunikationskompetenz                            | 52,03                  | (27,66) | 52,48          | (26,45) | 50,38              | (26,30) | 46,93          | (32,70) |
| Aktives Informationsverhalten                      | 2,95                   | (0,54)  | 2,87           | (0,55)  | 2,90               | (0,63)  | 2,81           | (0,67)  |

Anmerkung. M (SD): Mittelwert und Standardabweichung (zu Follow-up nicht adjustierte Werte)

IG: n = 103; WKG: n = 99 (10fach multipel imputierte Datensätze für Fälle fehlender Daten zu Follow-up)
