# Supplementary material for: Evaluation einer Basisschulung für Patienten mit rheumatoider Arthritis
Source: Springer Nature journal article supplement (doi:10.1007/s00393-020-00769-4), 2020-03-16
Supplement: MOESM2 [file 17802732]

Tabelle S2: Statistische Analyse „per protocol“

|                                                    | Gruppenvergleich                  |                 |        | Effektstärke |                 |
|----------------------------------------------------|-----------------------------------|-----------------|--------|--------------|-----------------|
|                                                    | mittlere<br>Differenz<br>(Effekt) | (95%-KI)        | p      | Cohens<br>d  | (95%-KI)        |
| <b>Hauptzielgrößen</b>                             |                                   |                 |        |              |                 |
| Wissenstest                                        | 2,15                              | (1,21 - 3,09)   | <0,001 | 0,64         | (0,35 - 0,92)   |
| Selbsteinschätzung des Wissen und<br>Zufriedenheit | 3,61                              | (2,01 - 5,22)   | <0,001 | 0,62         | (0,34 - 0,91)   |
| Gesundheitskompetenz/<br>Health Literacy           | 2,34                              | (0,80 - 3,88)   | 0,002  | 0,43         | (0,14 - 0,71)   |
| <b>Nebenzielgrößen</b>                             |                                   |                 |        |              |                 |
| <i>Einstellungen</i>                               |                                   |                 |        |              |                 |
| Krankheitsakzeptanz                                | -0,07                             | (-0,36 - 0,23)  | 0,575  | -0,06        | (-0,34 - 0,22)  |
| Krankheitskommunikation                            | 0,59                              | (0,30 - 0,88)   | <0,001 | 0,57         | (0,28 - 0,85)   |
| Selbstwirksamkeit                                  | 0,30                              | (-0,26 - 0,85)  | 0,227  | 0,15         | (-0,13 - 0,43)  |
| Kontrollüberzeugung                                | -0,03                             | (-0,14 - 0,08)  | 0,474  | -0,08        | (-0,36 - 0,20)  |
| <i>Erkrankung und Befinden</i>                     |                                   |                 |        |              |                 |
| Funktionsfähigkeit                                 | -3,55                             | (-6,34 - -0,76) | 0,009  | -0,35        | (-0,63 - -0,07) |
| Schmerzbelastung                                   | 0,36                              | (-0,05 - 0,77)  | 0,069  | 0,24         | (-0,04 - 0,52)  |
| Krankheitsaktivität                                | 0,05                              | (-0,33 - 0,42)  | 0,757  | 0,03         | (-0,24 - 0,31)  |
| Globale Selbsteinschätzung der<br>Erkrankung       | -0,07                             | (-0,57 - 0,44)  | 0,716  | -0,04        | (-0,31 - 0,24)  |
| Depression und Angst                               | -0,14                             | (-0,97 - 0,68)  | 0,471  | -0,05        | (-0,33 - 0,23)  |
| <i>Patientenkompetenz</i>                          |                                   |                 |        |              |                 |
| Kommunikationskompetenz                            | 3,62                              | (-4,34 - 11,59) | 0,267  | 0,13         | (-0,15 - 0,41)  |
| Aktives Informationsverhalten                      | 0,07                              | (-0,11 - 0,24)  | 0,319  | 0,11         | (-0,17 - 0,39)  |

Anmerkung. p: Signifikanz für den ANCOVA-Gruppenvergleich zu Follow-up (adjustiert für jeweiligen Ausgangswert)

95%-KI: Konfidenzintervall

IG: n = 103; WKG: n = 99 (10fach multipel imputierte Datensätze für Fälle fehlender Daten zu Follow-up)
